# Supplementary material for: Climate Impacts of Parameterizing Subgrid Variation and Partitioning of Land Surface Heat Fluxes to the Atmosphere with the NCAR CESM1.2
Source: Copernicus journal article supplement (doi:10.5194/gmd-2022-114), 2022-06-07
Supplement: Supplementary file [file gmd-2022-114-AC1-supplement.pdf]

## Reply to the comments by Referee #1

We thank the reviewer for the comments and suggestions to improve our manuscript. Below is our point-by-point response to these comments. The reviewer's comments are in italics, our responses are in normal font, and manuscript revisions are in blue.

*Yin et al. (2022) builds on work presented in Sun et al. (2021), which introduced a new parameterization to capture the impacts of subgrid surface fluxes by randomly sampling from distributions of sensible and latent heat fluxes within a grid cell and using those samples to drive unique realizations of the PBL and convection schemes in CESM1.2. Yin et al. expand on that to include a condition that the sensible and latent heat fluxes being sampled are either positively or negatively correlated with one another to better capture their relationship and land-atmosphere interactions. The method is novel and holds promise for inclusion in GCMS, though I believe major revisions are needed before this work is published.*

**Reply:** We appreciate the reviewer's positive remarks.

*My main concern is that while model improvements stemming from EXP\_COR are strongly emphasized, regions where performance has been degraded are rarely discussed. It is not yet clear that this version of the parameterization represents a strong improvement over the original EXP run. The discussion around each of the figures requires major revision as a result. It would also be beneficial to highlight the model performance globally with more detail.*

**Reply:** This study aims to present a thorough evaluation of the performance of two parametrizations on simulated climate variables rather than seek significant improvements to all the variables in the EXP\_COR run compared to the original EXP run. One vital improvement we expected is to see whether the stubborn bias of the simulated precipitation over the southern and eastern margins of the TP in the EXP run (also seen in other GCM simulations) can be alleviated in the EXP\_COR run. Following the suggestion, in the revised manuscript, we tuned down the tone by explicitly discussing both improvements and degradations in the EXP\_COR run relative to the EXP run. The evaluations of all the variables at the global scale have been included. Please see the detailed response to the major and minor comments below.

### **Major Comments**

#### **Comment 1:**

*Section 2.1: Since the parameterization introduced in Sun et al. 2021 is still so new and not yet widely known/implemented, further explanation and clarification should be included here. More details of the formulation of the normal distribution (i.e., their Eq. 3) would be helpful at minimum.*

**Reply:** Thanks for the valuable suggestion. We have included a more detailed introduction to the Sun et al. (2021) parameterization in Section 2.1 in the revision:

“This scheme established the truncated normal distributions of the subgrid sensible and latent heat fluxes independently within the grid cell at each time step. The probability density function (PDF) of subgrid sensible and latent heat flux in a given grid cell was calculated by

$$f(x|\bar{F}, \sigma, F_{min}, F_{max}) = \frac{\frac{1}{\sigma}\phi\left(\frac{x-\bar{F}}{\sigma}\right)}{\Psi\left(\frac{F_{max}-\bar{F}}{\sigma}\right) - \Psi\left(\frac{F_{min}-\bar{F}}{\sigma}\right)}, x \in [F_{min}, F_{max}] \quad (1)$$

where  $\bar{F}$  is the weighted average value of all subgrid heat fluxes,  $\sigma$  is the standard deviation,  $F_{min}$  and  $F_{max}$  are the minima and maxima of the subgrid heat fluxes, respectively, and  $\phi$  and  $\Psi$  are the PDF and the cumulative distribution function (CDF) of the standard normal distribution, respectively.” (Lines 86-92 in the revision)

**Comment 2:**

*Line 126: The PBL and convective parameterizations are called 16 times per time step to fully sample these subgrid fluxes; what’s the impact of that on model efficiency (run time vs. throughput)? Would this be cost prohibitive to implement in the current version of CAM (CAM5) for example, due to its use of CLUBB? It’s suggested later that this parameterization could be easily added to CESM and other GCMS, but this information is key to that statement.*

**Reply:** Thanks for this constructive suggestion. We have included Table R1 showing the run time per step and throughput for the CTL and EXP\_COR runs in the supplementary Table S2 and discussed this in the discussion section in Lines 431-440 in the revision:

“With 208 CPU cores in total for each simulation, the total run time per step (~0.50 sec) in the EXP\_COR run is almost twice that in the CTL run (~0.26 sec) as a result of calling the PBL and convective parameterizations 16 times and the resulting extra communication cost (Table S2). However, compared with the four-mode version of the Modal Aerosol Module (MAM4) updated from MAM3 and the Cloud Layers Unified by Binormals (CLUBB) scheme instead of the CAM5 boundary layer turbulence, shallow convection, and cloud macrophysics schemes in CAM6, the computational cost here is much smaller and thus acceptable. Given the heavy computational cost of CLUBB, this could be challenging for computational efficiency if using this scheme in CESM2 (CESM version 2). Therefore, further improvements are needed. For example, according to the number of PFTs in each grid cell, the number of multiple calls (up to 16) of the CLUBB can be varied in different grid cells. Alternatively, do this only when the number of PFTs is larger than a threshold. In the meantime, parallel optimization should be applied to multiple calls.”

**Table R1.** Run time per step and throughput for the CTL and EXP\_COR runs. Unit: second.

|                    | CTL     | EXP_COR |
|--------------------|---------|---------|
| Total              | 0.25642 | 0.48900 |
| Convection         | 0.09949 | 0.19035 |
| PBL                | 0.02286 | 0.09320 |
| CLM                | 0.06643 | 0.06936 |
| Dynamic            | 0.02696 | 0.02818 |
| Communication time | 0.01975 | 0.08248 |

**Comment 3:**

*Lines 148-150: I appreciate the need to limit the scope of this study but given that a portion of the motivation for this work was a more thorough exploration of other variables (2m temperature, surface fluxes, clouds, etc.) and that this is a modified parameterization relative to Sun et al. – it would be useful to first confirm that this is still a critical region/season where the new scheme produces a sizable impact. It’s noted that global mean values are assessed in Section 3.3, but there are no spatial maps either annually or seasonally, which could strengthen the study.*

**Reply:** Thanks for the suggestion. The global distributions of the annual mean 2 m air temperatures, surface fluxes and clouds in the three simulations (Figs. R1-7) are included in the supplementary material as Figs. S3-9. The spatial correlation coefficients and root mean square error for annual and seasonal means (Table R2 here) are summarized in Table 1 in Sect. 3.3 instead of the Taylor diagram in the revision. The original figures regarding the differences among the three simulations in the main text have been updated with a global view (Figs. 3 and 7-12 in the revision). The related discussion has been added in Lines 379-380 in the revised manuscript:

“As presented in Table 1 (global distributions shown in Figs. S3-9), overall, the simulation statistics of the EXP and EXP\_COR runs are comparable to those of the CTL run, although slightly different in some seasons.”

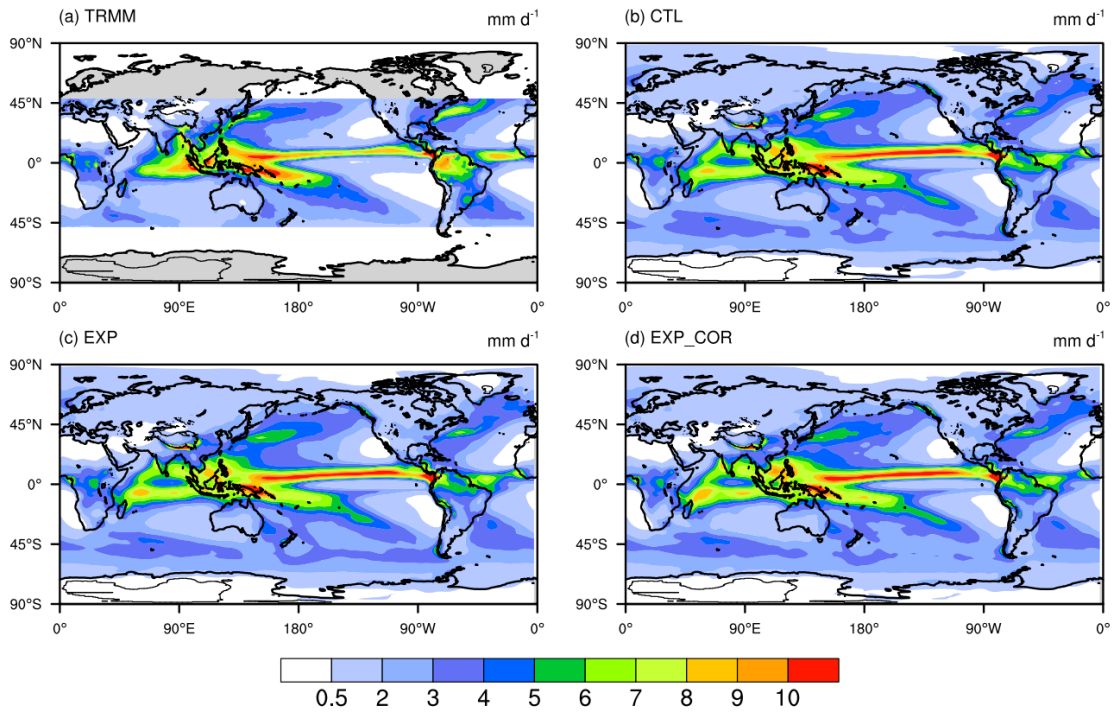

**Figure R1.** Spatial distributions of the annual mean precipitation from (a) TRMM, (b) CTL, (c) EXP and (d) EXP\_COR.

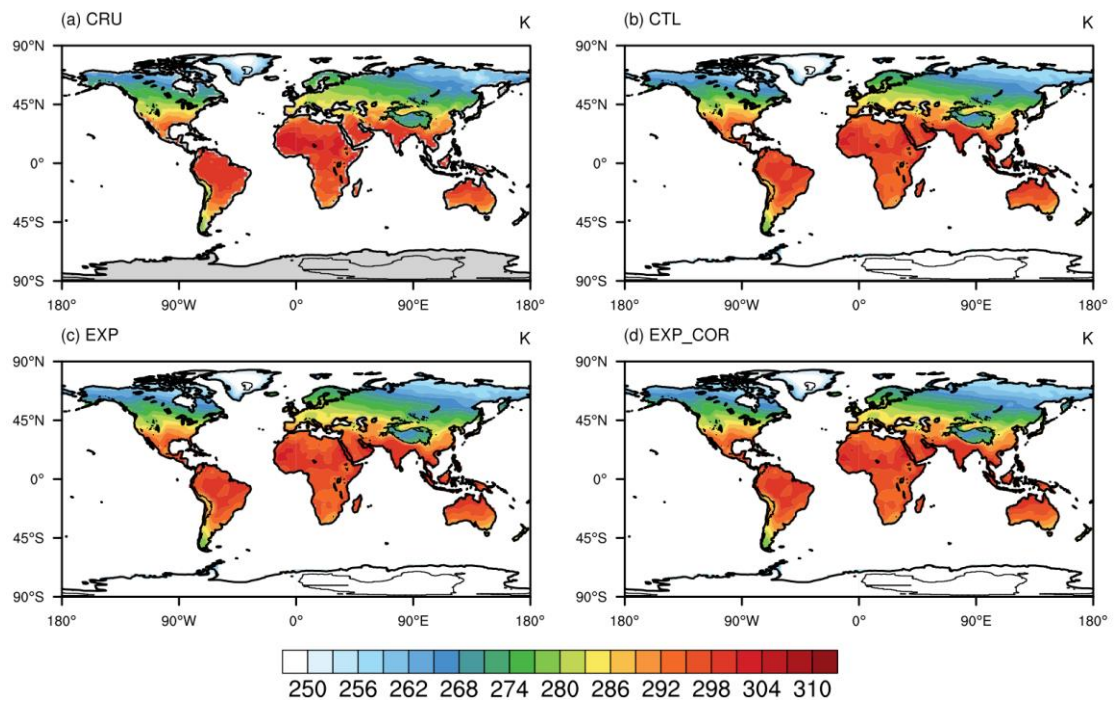

**Figure R2.** Spatial distributions of the annual mean 2 m temperature from (a) CRU, (b) CTL, (c) EXP and (d) EXP\_COR.

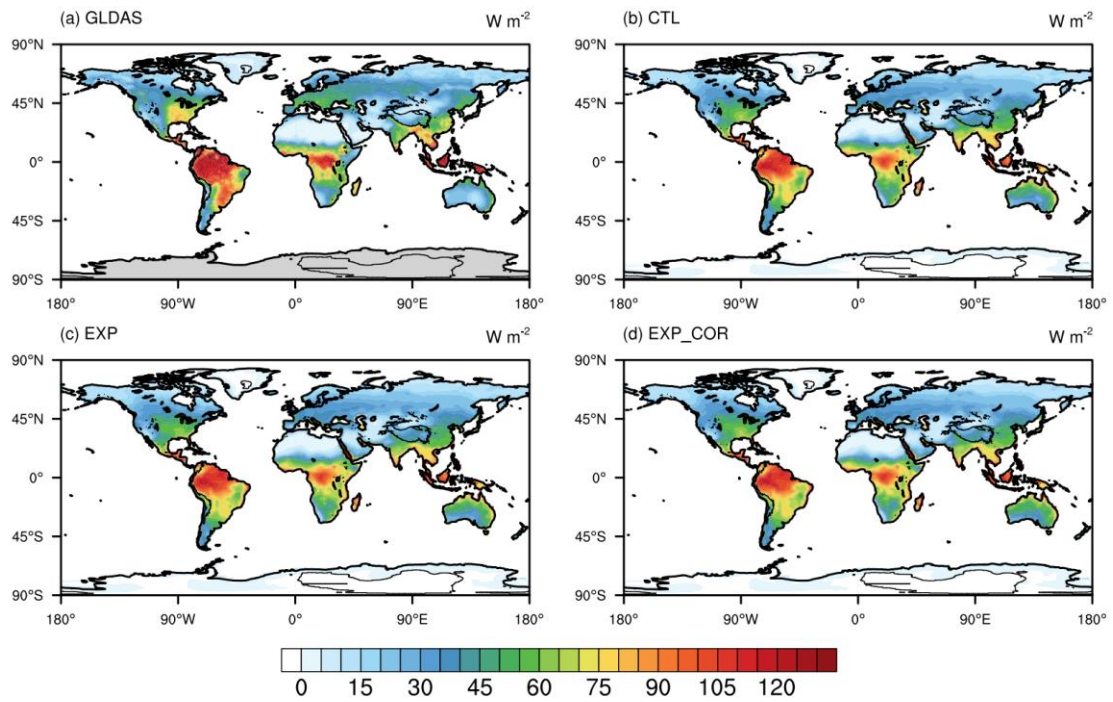

**Figure R3.** Spatial distributions of the annual mean latent heat flux from (a) GLDAS, (b) CTL, (c) EXP and (d) EXP\_COR.

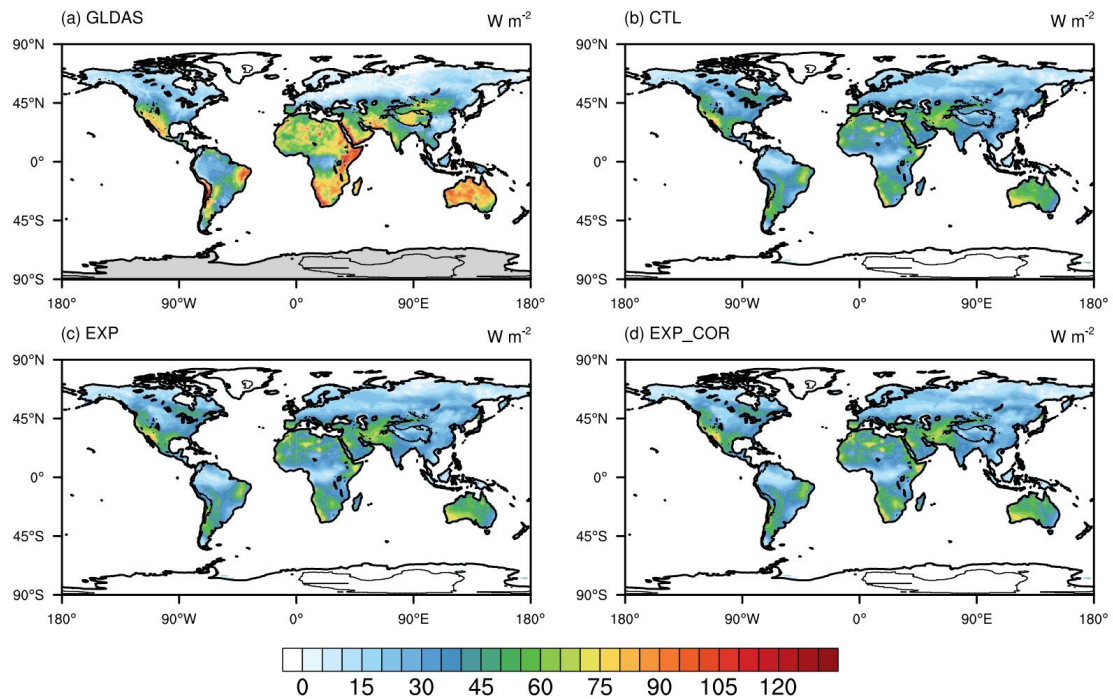

**Figure R4.** Spatial distributions of the annual mean sensible heat flux from (a) GLDAS, (b) CTL, (c) EXP and (d) EXP\_COR.

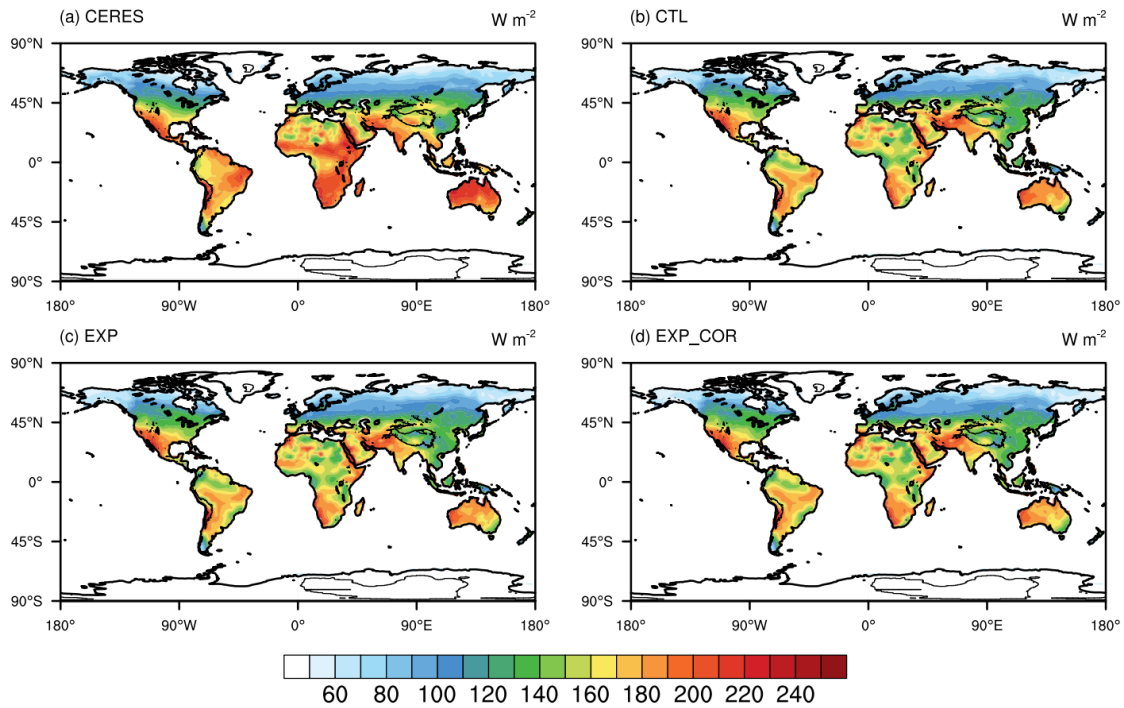

**Figure R5.** Spatial distributions of the annual mean net surface shortwave flux from (a) CERES, (b) CTL, (c) EXP and (d) EXP\_COR.

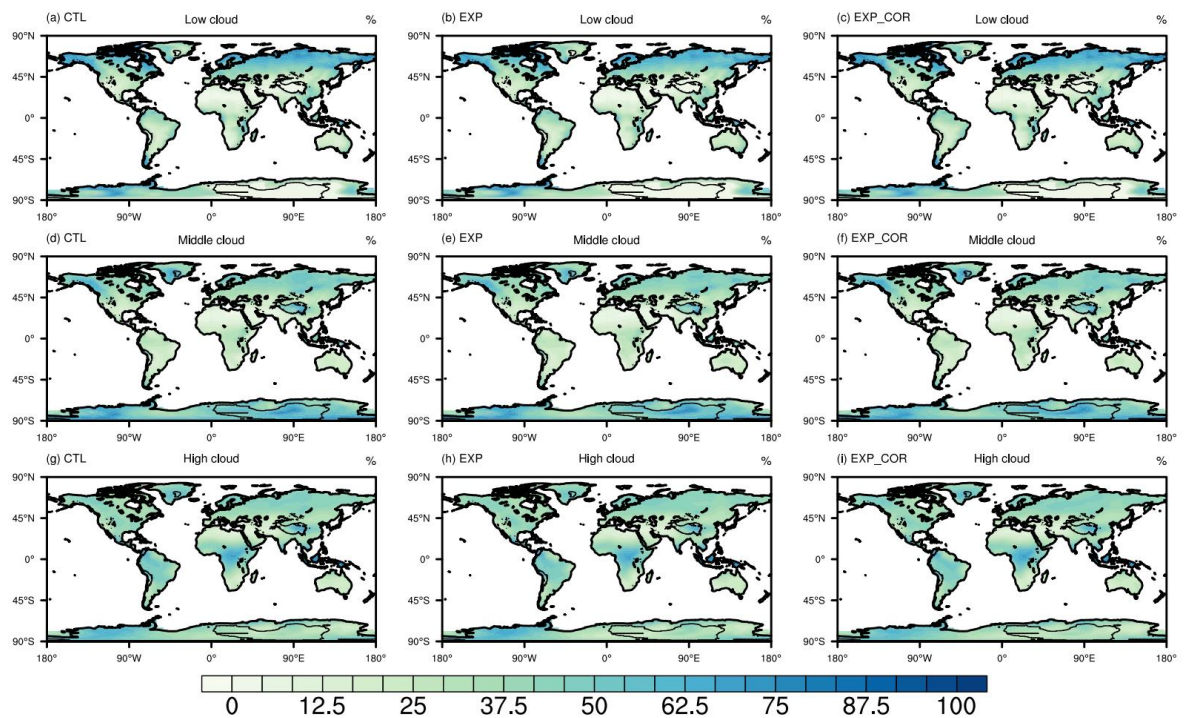

**Figure R6.** Spatial distributions of the annual mean (a-c) low, (d-f) middle and (g-i) high cloud fraction for CTL (left), EXP (middle) and EXP\_COR (right).

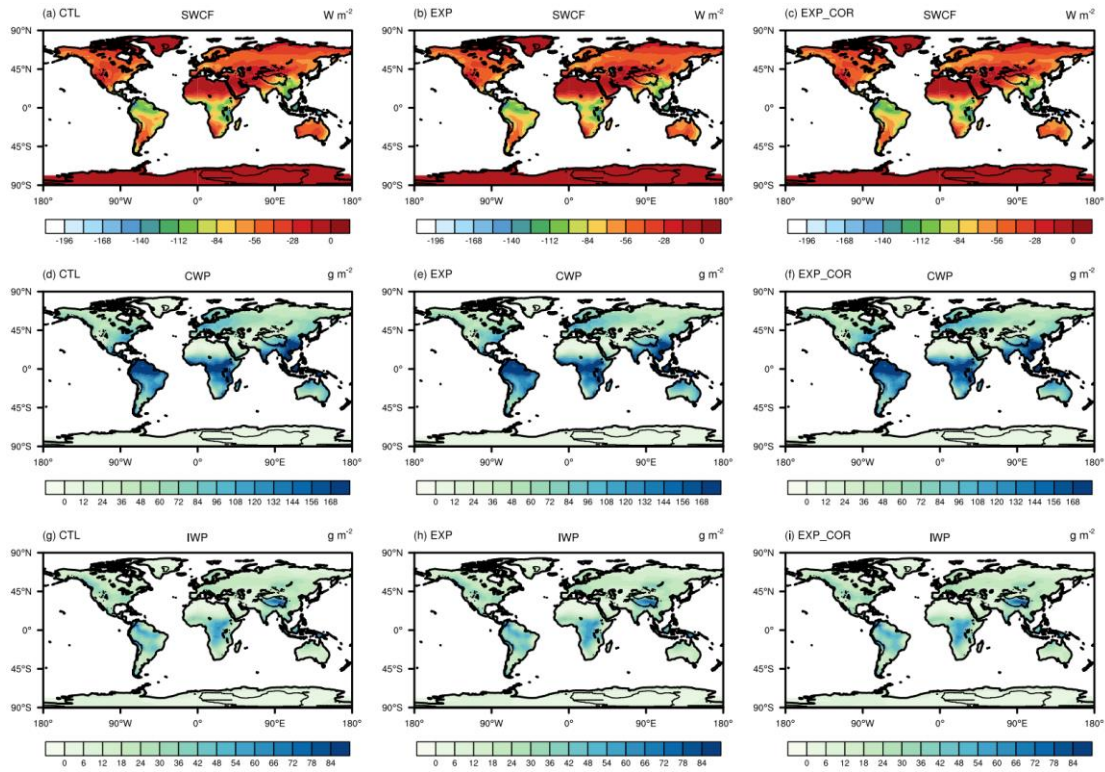

**Figure R7.** Spatial distributions of the annual mean (a-c) shortwave cloud radiative forcing (units:  $W m^{-2}$ ), (d-f) total cloud water path (units:  $g m^{-2}$ ), and (g-i) ice water path (units:  $g m^{-2}$ ) for CTL (left), EXP (middle) and EXP\_COR (right).

**Table R2.** The COR and RMSE values in the CTL, EXP and EXP\_COR runs. MAM is for March-April-May, JJA for June-July-August, SON for September-October-November, and DJF for December-January-February. The best performance among the three experiments is highlighted in bold.

| Variables          | Period | COR         |             |             | RMSE         |             |             |
|--------------------|--------|-------------|-------------|-------------|--------------|-------------|-------------|
|                    |        | CTL         | EXP         | EXP_C<br>OR | CTL          | EXP         | EXP_C<br>OR |
| Precipitation      | MAM    | <b>0.82</b> | <b>0.82</b> | 0.81        | <b>1.55</b>  | <b>1.55</b> | 1.61        |
|                    | JJA    | 0.78        | <b>0.80</b> | 0.79        | 2.11         | <b>2.03</b> | 2.04        |
|                    | SON    | 0.85        | 0.85        | 0.85        | 1.53         | <b>1.52</b> | 1.53        |
|                    | DJF    | <b>0.85</b> | 0.84        | 0.84        | <b>1.62</b>  | 1.65        | 1.73        |
|                    | Annual | 0.86        | 0.86        | 0.86        | 1.29         | <b>1.27</b> | 1.30        |
| 2 m<br>Temperature | MAM    | 0.98        | 0.98        | 0.98        | 2.57         | 2.50        | <b>2.49</b> |
|                    | JJA    | 0.95        | 0.95        | 0.95        | 2.70         | <b>2.66</b> | 2.67        |
|                    | SON    | 0.98        | 0.98        | 0.98        | 2.64         | 19.94       | <b>2.61</b> |
|                    | DJF    | 0.99        | 0.99        | 0.99        | 4.01         | <b>3.76</b> | 3.80        |
|                    | Annual | 0.98        | 0.98        | 0.98        | 2.50         | 5.86        | <b>2.42</b> |
|                    | MAM    | <b>0.67</b> | 0.65        | 0.65        | <b>34.08</b> | 34.73       | 34.43       |

|                                  |        |             |             |             |              |              |              |
|----------------------------------|--------|-------------|-------------|-------------|--------------|--------------|--------------|
| Sensible<br>Heat Flux            | JJA    | 0.55        | <b>0.56</b> | <b>0.56</b> | 30.67        | <b>30.57</b> | 30.89        |
|                                  | SON    | 0.86        | 0.86        | 0.86        | <b>23.40</b> | 25.79        | 23.92        |
|                                  | DJF    | <b>0.88</b> | 0.87        | 0.87        | <b>23.71</b> | 24.42        | 24.42        |
|                                  | Annual | <b>0.74</b> | 0.73        | 0.73        | <b>22.71</b> | 23.72        | 23.28        |
| Latent Heat<br>Flux              | MAM    | <b>0.89</b> | 0.88        | 0.88        | <b>15.84</b> | 16.37        | 16.23        |
|                                  | JJA    | <b>0.82</b> | <b>0.82</b> | 0.81        | 24.24        | <b>23.18</b> | 23.40        |
|                                  | SON    | 0.88        | 0.88        | 0.88        | 17.34        | 17.57        | <b>17.33</b> |
|                                  | DJF    | <b>0.92</b> | 0.91        | 0.92        | <b>15.99</b> | 16.93        | 16.44        |
|                                  | Annual | 0.90        | 0.90        | 0.90        | <b>13.92</b> | 14.17        | 14.15        |
| Net Surface<br>Shortwave<br>Flux | MAM    | <b>0.92</b> | 0.91        | 0.91        | <b>21.89</b> | 23.20        | 23.47        |
|                                  | JJA    | 0.83        | 0.83        | 0.83        | <b>29.75</b> | 29.84        | 30.21        |
|                                  | SON    | 0.96        | 0.96        | 0.96        | <b>20.35</b> | 26.06        | 21.10        |
|                                  | DJF    | 0.96        | 0.96        | <b>0.97</b> | <b>24.28</b> | 24.51        | 24.32        |
|                                  | Annual | 0.93        | 0.93        | 0.93        | <b>19.35</b> | 21.04        | 20.05        |

**Comment 4:**

Lines 154-155: “It is encouraging that after taking the subgrid energy partitioning into account, the longstanding biases are efficiently mitigated in the EXP\_COR run.” This is not readily apparent in the bias plots (Fig 2f vs. 2d). Though I see that relative to the CTL (Fig 2e), there is indeed a small decrease in rain rate along the southern edge of the TP, the bias is still over 5 mm/day. It also appears that a dry bias has been re-introduced over Eastern China in EXP\_COR that had been mitigated in EXP. A more thorough discussion of where EXP\_COR does not improve precipitation is warranted.

**Reply:** In the CTL run, the wet bias over the southern margin of the TP can exceed 11 mm d<sup>-1</sup>, while that over the eastern margin of the TP is approximately 7 mm d<sup>-1</sup>. Additionally, seen in other CMIP5&6 models, the biases there are much larger than those in the rest of the world (Fig. R8) (Su et al., 2013; Yu et al., 2015; Zhu and Yang, 2020; Lun et al., 2021). In contrast, in the EXP\_COR run, the reduced biases over these two regions can be as much as 2.5 mm d<sup>-1</sup>, accounting for a reduction of approximately 25%, especially over the southern margin of the TP (Fig. R9). Given that there are many causes (e.g., unrealistic water vapor advection and the absence of subgrid topographic effects) resulting in the severe overestimation of precipitation along the TP, the improvement in this study, to some extent, is impressive. In the revision, we have adjusted the contour levels and the associated color bar to make the reduced bias in the EXP\_COR run noticeable when comparing the biases in the CTL and EXP runs (i.e., using Fig. R8 to replace Fig. 2 and adding Fig. R9 as Fig. 3 in the revision). Additionally, following the suggestion, the degradation in the EXP\_COR run compared with the EXP run is discussed in Lines 193-194:

“Over other regions such as southern China, the Middle East and Indonesia, there are some slight degradations in the EXP\_COR run compared to the EXP run.”

References:



- Lun, Y., Liu, L., Cheng, L., Li, X., Li, H., and Xu, Z.: Assessment of GCMs simulation performance for precipitation and temperature from CMIP5 to CMIP6 over the Tibetan Plateau, *Int. J. Climatol.*, 41, 3994-4018, 10.1002/joc.7055, 2021.
- Su, F., Duan, X., Chen, D., Hao, Z., and Cuo, L.: Evaluation of the Global Climate Models in the CMIP5 over the Tibetan Plateau, *J. Climate*, 26, 3187-3208, 10.1175/jcli-d-12-00321.1, 2013.
- Yu, R., Li, J., Zhang, Y., and Chen, H.: Improvement of rainfall simulation on the steep edge of the Tibetan Plateau by using a finite-difference transport scheme in CAM5, *Clim. Dynam.*, 45, 2937-2948, 10.1007/s00382-015-2515-3, 2015.
- Zhu, Y.-Y. and Yang, S.: Evaluation of CMIP6 for historical temperature and precipitation over the Tibetan Plateau and its comparison with CMIP5, *Adv. Clim. Change Res.*, 11, 239-251, 10.1016/j.accre.2020.08.001, 2020.

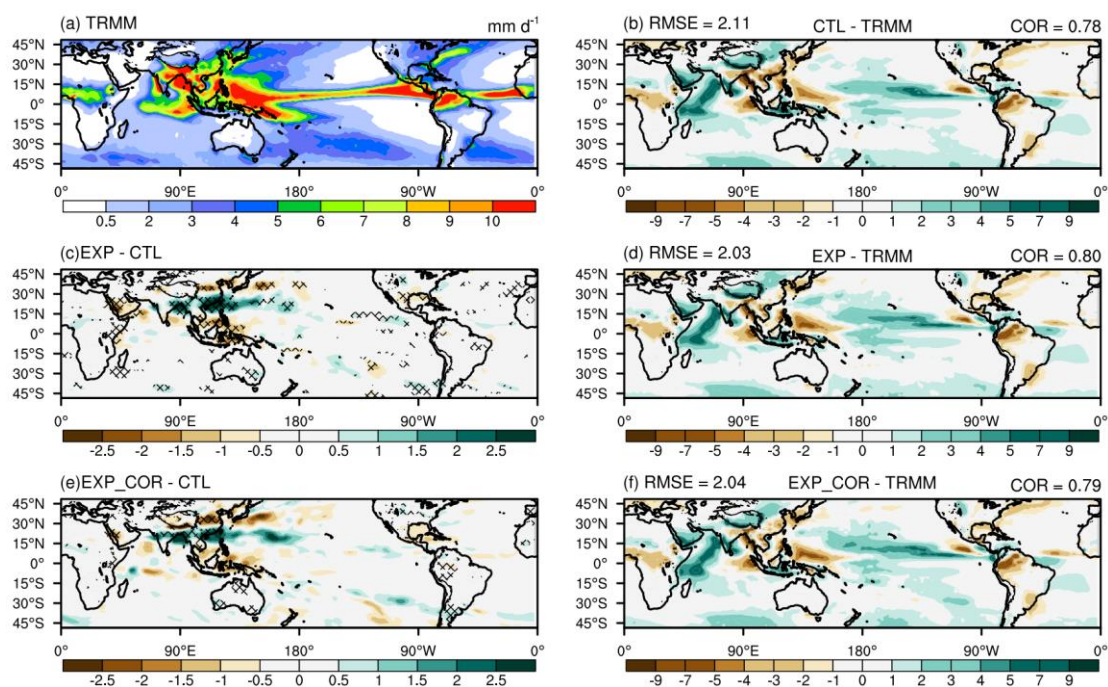

**Figure R8.** Spatial distributions of the JJA (June-July-August) mean precipitation for (a) TRMM, the biases of (b) CTL, (d) EXP, and (f) EXP\_COR with respect to TRMM, and the differences between EXP and CTL (c) and between EXP\_COR and CTL (e). The crossed areas are significant at the 95% level. The regionally averaged spatial correlation coefficient (COR) and root mean square error (RMSE) are calculated at the top of (b), (d) and (f).

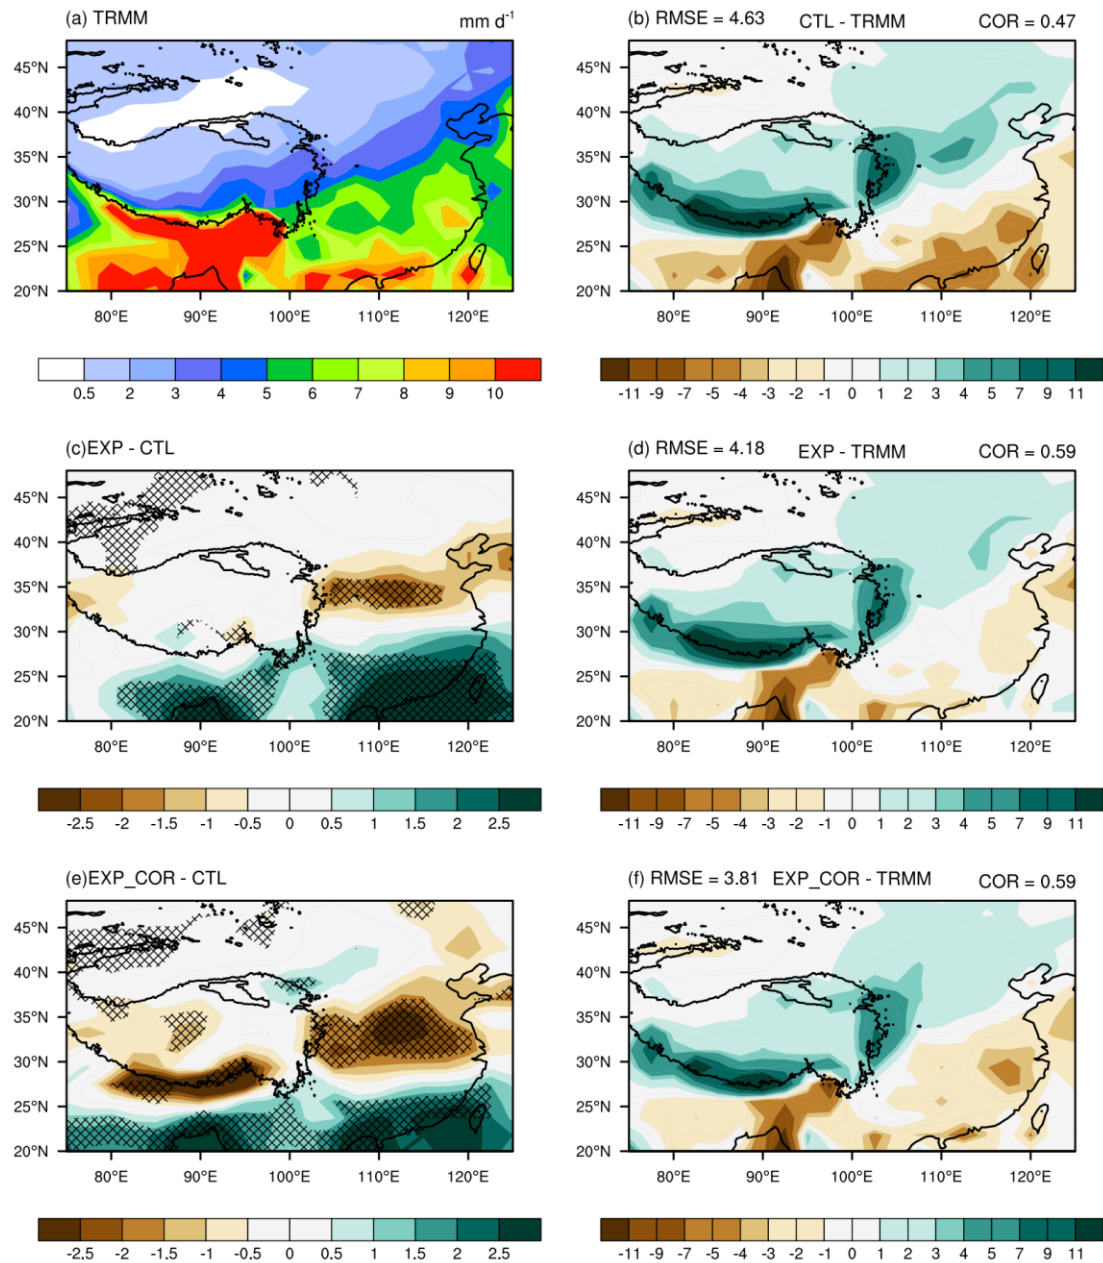

**Figure R9.** Same as Figure R8 but focusing on the study area (20-50°N, 75-125°E). The regionally averaged spatial COR and RMSE are calculated at the top of (b), (d) and (f).

**Comment 5:**

*Figure 3: My understanding is that the sum of panels 3a and 3c should match Fig. 2c, and that 3b+3d should equal 2e – is this correct? If so, I wonder if there is a slight plotting mismatch; in Fig 2c, changes in rainfall rarely extend past the TP border, and the small region that does is on the order of 0.5-1 mm/day. But in Fig 3a and 3c, there are precipitation increases that extend along much of the southeastern TP border and into the TP itself, which can be on the order of 1-2 mm/day.*

**Reply:** We apologize for the mismatch. The original Fig. 3 for the EXP run is not correct

because we did not use the same data as in Sun et al. (2021). Figures 3 and 2c&e have been updated by Figs. R10 and R9c&e, respectively (i.e., Figs. 5a-d and 4c&e in the revision).

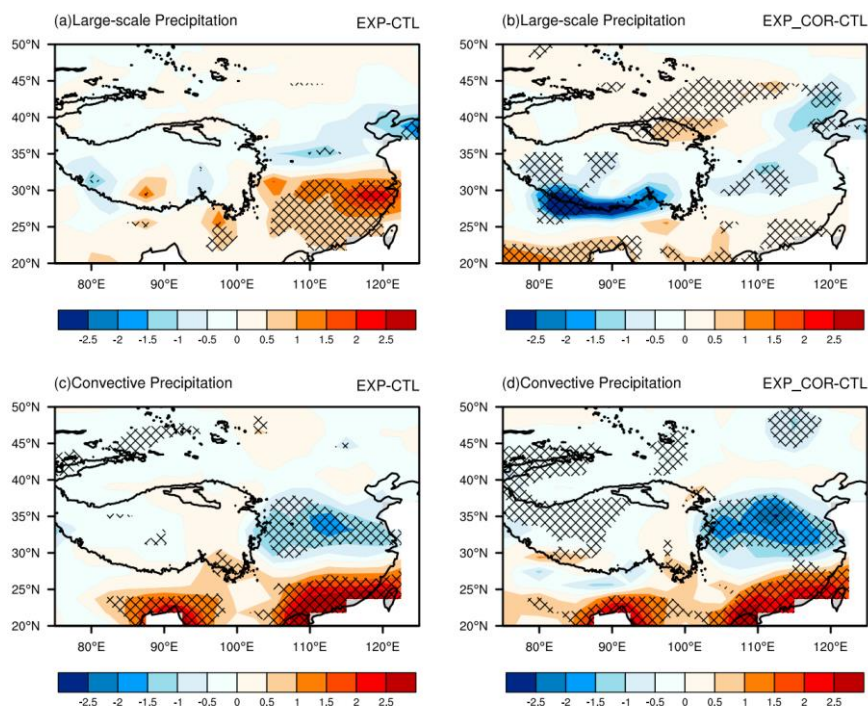

**Figure R10.** Spatial distribution of the differences in (the first row) large-scale precipitation and (the second row) convective precipitation between (left) EXP and CTL and between (right) EXP\_COR and CTL. The crossed areas are significant at the 95% level.

**Comment 6:**

Lines 200-201: *“In contrast, in the EXP\_COR run (Fig. 5d), the SLP simulation is corrected...”* This does not appear to be the case. The decrease in SLP on the TP in the EXP\_COR vs. the CTL case is less than 1 hPa, but the bias in the CTL relative to MERRA2 is more than 10 hPa; the shift is quite small and does not correct the existing bias (though it does reduce it slightly).

**Reply:** In the revision, *“In contrast, in the EXP\_COR run (Fig. 5d), the SLP simulation is corrected...”* has been deleted, and the corresponding changes are made as follows:

Lines 248-249 in Sect. 3.1:

(1) *“Lower (higher) sea level pressure (SLP) anomalies over southern (northern) China are generated in the EXP\_COR run than in the EXP run.”*

Lines 265-266 in Sect. 3.2:

(2) *“The above analysis indicates that the precipitation simulation is improved through the adjustment of large-scale atmospheric circulation in the lower atmosphere, which is*

highly linked with grid-scale surface heating/cooling (Sun et al., 2021).”

and Lines 301-302:

(3) “As indicated in Sect. 3.1, large-scale atmospheric circulation in the lower atmosphere and local convection are altered as PBL heating changes affect clouds as well.”

**Comment 7:**

*Lines 217-218: “...the underestimations on the southern and eastern margins of the TP in the CTL runs are remarkably improved (Fig. 6f).” When looking for model improvements, it would make more sense to focus on the comparison against observations rather than the control, which would be Fig. 6d. In that light, there is again certainly some improvement in the model bias, but the scale of that change is perhaps minor: on the order of what looks like 2-4 W/m<sup>2</sup> when the bias is more than 20 W/m<sup>2</sup>. The language used in the text suggests a stronger change than is visible.*

**Reply:** We have tuned down the tone in Lines 278-279 in the revision:

“Furthermore, the biases on the southern and eastern margins of the TP and along 60°N in both the CTL and EXP runs are reduced (Fig. 7b-f).”

**Comment 8:**

*Lines 220-221: “The sensible heat flux changes in the EXP\_COR run are more significant than those in the EXP run (Fig. 7f), especially over northern China and the southern and eastern margins of the TP, resulting in better agreement with observations.” The change over northern China seems to be stronger in the EXP than the EXP\_COR simulation, while the increase in SHFLX over eastern China seems to have actually increased the bias there relative to both the CTL and EXP cases. Focusing in on the southern edge of the TP may miss out on the bigger regional picture in this case.*

**Reply:** Thanks for the comments. Based on a bigger regional picture, both improvements and degradations in the EXP\_COR run are discussed in Lines 293-295 in the revised manuscript:

“The positive changes over the southern and eastern margins of the TP in the EXP\_COR run are more significant than those in the EXP run (Fig. 8e&f). Nonetheless, we note some degradations from EXP to EXP\_COR run (e.g., over southern China).”

**Comment 9:**

*Lines 251-252: “In the EXP\_COR run, in addition to the already existing significant improvements in the EXP run...” While it’s stated that the EXP run alleviates the overestimation of surface shortwave flux in southern China, it is important to note that the EXP\_COR run reduces that improvement and even worsens the bias over eastern*

China (Fig. 2d). It also seems that the biases in EXP\_COR are larger than in EXP over north eastern China/southern Russia, despite general improvements over the TP.

**Reply:** These degradations in the EXP\_COR run have been pointed out in Lines 339-341 in the revision:

“In the EXP\_COR run, the underestimation over northern China and the TP in both the CTL and EXP runs is alleviated, although it slightly degrades the simulated shortwave flux over southern China. The negative biases over southeastern Russia in EXP\_COR are also larger than those in EXP.”

**Comment 10:**

Figure 12: Unfortunately, this diagram is incredibly hard to read. The legend and key need to use a much larger font size to be readable, and even within the plot itself, distinguishing shapes/numbers from each other is challenging. A table may be easier to read, but at minimum the Taylor diagram needs to be heavily revised. Section 3.3: Differences in the mean state are quite hard to distinguish given the readability issues of Fig. 12.

**Reply:** Thanks for the suggestion. Table R2-3 has been used instead of Fig. 12 in the revised main text and the supplementary materials (Tables 1 and S1). The related discussion has been revised accordingly in Lines 379-383:

“As presented in Table 1 (global distributions shown in Figs. S3-9), overall, the simulation statistics of the EXP and EXP\_COR runs are comparable to those of the CTL run, although slightly different in some seasons. When focusing on East Asia (Table S1), the new schemes outperform the default scheme in terms of COR and RMSE, implying the necessity and importance of parameterizing the subgird land surface heat fluxes to the atmosphere in GCMs in regions with complex terrain (e.g., the TP) and multiple surface types (e.g., eastern China).”

**Table R3.** The COR and RMSE values over the region (20°N-50°N, 75°E-125°E) for the CTL, EXP and EXP\_COR runs. MAM is for March-April-May, JJA for June-July-August, SON for September-October-November, and DJF for December-January-February. The best performance among the three experiments is highlighted in bold.

|               |        | COR         |             |             | RMSE        |      |             |
|---------------|--------|-------------|-------------|-------------|-------------|------|-------------|
|               |        | CTL         | EXP         | EXP_COR     | CTL         | EXP  | EXP_COR     |
| Precipitation | MAM    | <b>0.62</b> | <b>0.62</b> | 0.56        | <b>2.15</b> | 2.29 | 2.34        |
|               | JJA    | 0.48        | <b>0.60</b> | <b>0.60</b> | 4.51        | 4.07 | <b>3.71</b> |
|               | SON    | <b>0.56</b> | 0.51        | 0.55        | <b>1.89</b> | 1.92 | 2.01        |
|               | DJF    | <b>0.71</b> | 0.66        | 0.64        | <b>0.74</b> | 0.79 | 0.86        |
|               | Annual | 0.55        | <b>0.63</b> | <b>0.63</b> | 2.00        | 1.91 | <b>1.82</b> |
|               | MAM    | 0.95        | 0.95        | 0.95        | <b>3.09</b> | 3.14 | <b>3.09</b> |
|               | JJA    | 0.91        | 0.91        | 0.91        | <b>3.15</b> | 3.16 | 3.28        |

|                                     |        |             |             |             |              |              |              |
|-------------------------------------|--------|-------------|-------------|-------------|--------------|--------------|--------------|
| 2 m<br>Temperatu<br>re              | SON    | 0.96        | 0.96        | 0.96        | <b>2.77</b>  | 19.18        | 2.78         |
|                                     | DJF    | 0.97        | 0.97        | 0.97        | 4.59         | 4.24         | <b>4.17</b>  |
|                                     | Annual | 0.96        | 0.96        | 0.96        | 2.89         | 5.93         | <b>2.87</b>  |
| Sensible<br>Heat Flux               | MAM    | <b>0.44</b> | 0.43        | <b>0.44</b> | <b>34.08</b> | 34.73        | 34.43        |
|                                     | JJA    | 0.55        | <b>0.60</b> | 0.53        | 32.96        | <b>31.54</b> | 32.63        |
|                                     | SON    | -0.01       | 0.02        | <b>0.06</b> | 21.68        | 22.21        | <b>21.33</b> |
|                                     | DJF    | 0.35        | <b>0.37</b> | 0.32        | 21.09        | <b>20.78</b> | 21.50        |
|                                     | Annual | 0.02        | <b>0.05</b> | 0.03        | 25.84        | 25.88        | <b>25.83</b> |
| Latent<br>Heat Flux                 | MAM    | 0.72        | 0.73        | <b>0.76</b> | 17.69        | 17.27        | <b>16.92</b> |
|                                     | JJA    | 0.68        | 0.68        | <b>0.69</b> | 25.02        | <b>24.19</b> | 24.46        |
|                                     | SON    | 0.88        | 0.88        | 0.88        | 14.41        | 14.68        | <b>14.12</b> |
|                                     | DJF    | 0.84        | <b>0.86</b> | <b>0.86</b> | 9.06         | <b>8.28</b>  | 8.39         |
|                                     | Annual | 0.83        | 0.83        | <b>0.84</b> | 13.34        | 12.93        | <b>12.80</b> |
| Net<br>Surface<br>Shortwave<br>Flux | MAM    | <b>0.78</b> | 0.76        | 0.76        | <b>25.46</b> | 27.51        | 25.55        |
|                                     | JJA    | 0.69        | <b>0.76</b> | 0.71        | 27.28        | <b>25.95</b> | 26.38        |
|                                     | SON    | <b>0.66</b> | 0.63        | 0.61        | <b>18.78</b> | 22.21        | 19.78        |
|                                     | DJF    | 0.80        | <b>0.83</b> | 0.80        | 25.02        | <b>22.83</b> | 23.81        |
|                                     | Annual | <b>0.61</b> | <b>0.61</b> | 0.57        | <b>18.46</b> | 18.64        | 18.59        |

**Comment 11:**

Lines 328-330: “In summary, the performance of the mean state simulations does not change significantly when using the modified scheme (EXP\_COR), indicating that the subgrid parameterization scheme can be incorporated into the GCMs without heavy retuning.” This may be a bit overstated. It’s important to acknowledge that the current analysis is dependent only on annual, global/zonal means, and only a handful of variables. Spatial/seasonal maps could strengthen the arguments made.

**Reply:** Since Tables R2-3 have summarized the performance of the spatial distributions of seasonal means, we prefer not to show the spatial maps again. As seen in the two tables, for the simulations of precipitation, 2 m air temperature, sensible heat flux, latent heat flux and net surface shortwave flux, the overall performance in EXP\_COR does not change much. However, given only a handful of variables as the reviewer indicated, we removed the statement of “indicating that the subgrid parameterization scheme can be incorporated into the GCMs without heavy retuning” in Lines 379-381 in the revision:

“As presented in Table 1 (global distributions shown in Figs. S3-9), overall, the simulation statistics of the EXP and EXP\_COR runs are comparable to those of the CTL run, although slightly different in some seasons.”

**Comment 12:**

Lines 382-383: “The mean states did not change much after the introduction of the new parameterization scheme, and thus, the new scheme can be implemented in the CESM without heavy retuning.” In addition to the concerns raised above, it’s important to note

*that these experiments are using an outdated version of CESM. In order to be incorporated into the model, these results would need to be reassessed using CESM2; some explanation of why CESM1.2 vs. CESM2 was used could be helpful in this case, and/or whether there are potential challenges to using this within CESM2 vs. CESM1.2.*

**Reply:** Please see our response to the major comment 2 regarding the potential challenges to using this in CESM2. As for why we use CESM1.2 rather than CESM2 in this study, the main reason is that we need to perform the comparison with Sun et al. (2021), which used CESM1.2 as well. We stated this in Line 78 in the revision:

“To be consistent with Sun et al. (2021), the GCM used in this study is the NCAR CESM1.2.”

### **Minor Comments**

#### **Comment 1:**

*Lines 34-36: “This results in most of the precipitation simulation errors in GCMs, such as...” Are the authors saying that the use of grid mean rather than subgrid surface fluxes is responsible for the majority of precipitation biases in GCMs? That may be an exaggeration; the studies cited in the rest of the second sentence seem to suggest a range of other ways to mitigate precipitation biases, in fact. Suggest rephrasing for clarity.*

**Reply:** We rephrased the sentence in Lines 37-40 in the revision for clarity:

“This is one of the causes of many precipitation simulation errors in GCMs, such as the bias of the rainfall intensity spectrum (e.g., Dai, 2006; O’Brien et al., 2016; Na et al., 2020; Wang et al., 2021a) and the unrealistic precipitation over the Indian summer monsoon region (e.g., Waliser et al., 2012; Wang et al., 2018) and the eastern and southern parts of the steep Tibetan Plateau (TP) (e.g., Zhou et al., 2021).”

#### **Comment 2:**

*Line 36: Suggest additional citations on the bias of the rainfall intensity spectrum, as this is a frequently recognized bias that was recognized well before 2021 – the historical context is useful.*

**Reply:** The following references (most of them are published before 2021) have been added to the revised manuscript.

Dai, A.: Precipitation Characteristics in Eighteen Coupled Climate Models, *J. Climate*, 19, 4605-4630, doi: 10.1175/JCLI3884.1, 2006.

O'Brien, T. A., Collins, W. D., Kashinath, K., Rübél, O., Byna, S., Gu, J., Krishnan, H., and Ullrich, P. A.: Resolution dependence of precipitation statistical fidelity in hindcast simulations, *J. Adv. Model Earth Syst.*, 8, 976-990, 10.1002/2016ms000671, 2016.

Na, Y., Fu, Q., and Kodama, C.: Precipitation Probability and Its Future Changes From a Global Cloud-Resolving Model and CMIP6 Simulations, *J. Geophys. Res. - Atmos.*, 125, 10.1029/2019jd031926, 2020.

**Comment 3:**

*Line 42: "...changes in vegetation density have been found to favor the release of latent heat..." Please be specific in what direction the changes are occurring; does an increase or a decrease in vegetation density link to favored LHFLX?*

**Reply:** It has been specified in Lines 42-45 in the revision:

"For instance, forests dissipate sensible heat to the PBL more efficiently than open landscapes (Rotenberg and Yakir, 2010; Wei et al., 2021), and the increase in vegetation density has been found to favor the release of latent heat rather than sensible heat during the past three and a half decades (Forzieri et al., 2020)."

**Comment 4:**

*Fig 1: Does this spatial pattern of correlation coefficients change with season? It would likely be more useful to the reader to consider DJF/JJA means at least to understand the importance of the correlation coefficient being a time-varying quantity rather than one that is static in time.*

**Reply:** Yes, the spatial pattern of the correlation coefficients varies with time. The DJF/JJA patterns of correlation coefficients (Fig. R11 below) have been added in the revision as Fig. 2. The related changes in the main text are made in Lines 128-136:

"The spatial patterns of the June-July-August (JJA) mean and December-January-February (DJF) mean correlation coefficients are given in Fig. 2b&c. In boreal summer, the sensible and latent heat fluxes in most regions of the world are negatively correlated, except for the TP, Greenland, the central US, and southern Australia (Fig. 2b). In boreal winter, the global distribution is similar to that of the annual mean, showing larger magnitudes of the positive correlation coefficients and smaller magnitudes of the negative correlation coefficients (Fig. 2c). The regions where the correlation coefficients are positive in both summer and winter are mainly located in high latitudes and altitudes. In summer, owing to the melting of snow, latent heat flux increases accordingly as the land surface gains more water for evaporation, and sensible heat flux increases synchronously from enhanced surface net radiation due to increased incoming solar radiation and reduced snow albedo. For winter, decreased solar radiation and increased snow cover reduce both sensible and latent heat fluxes."



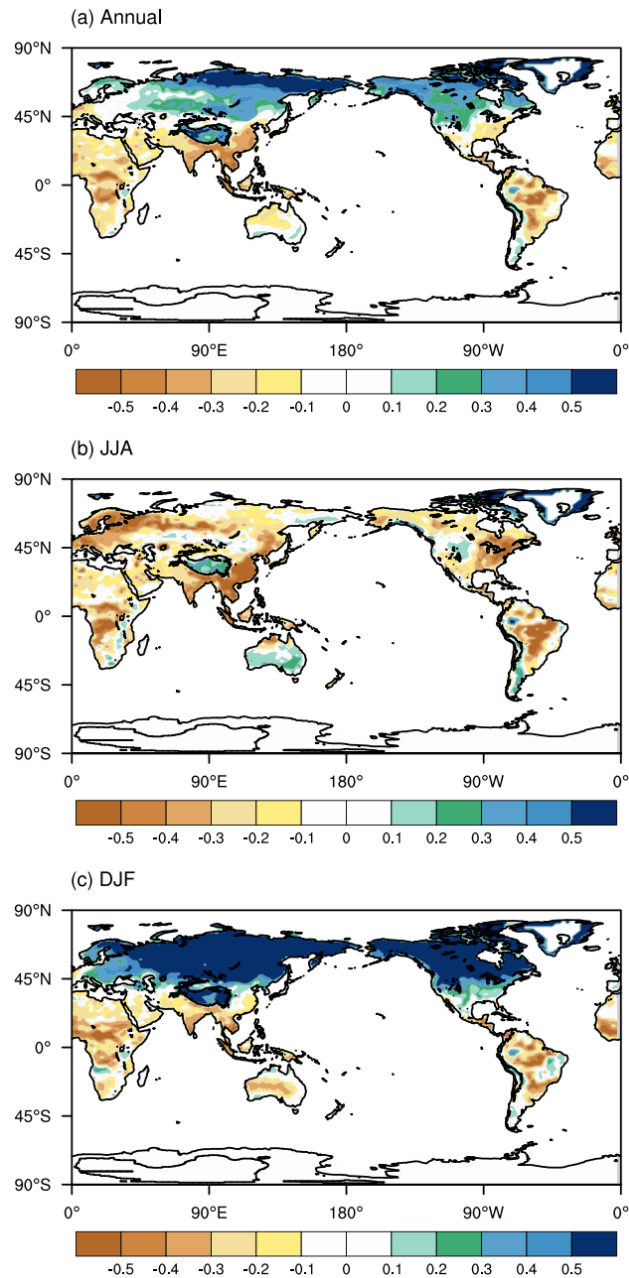

**Figure R11.** Spatial distribution of (a) annual, (b) JJA (June-July-August) and (c) DJF (December-January-February) mean correlation coefficients  $r$  between the subgrid surface sensible heat and latent heat fluxes in the EXP\_COR simulation.

**Comment 5:**

*Line 123: Please clarify the time scale at which the correlation coefficient  $r$  varies; is this computed at each time step?*

**Reply:** Yes, it varies at each time step. We clarified this in Lines 118-124 in the revision:

“However, we can compute the correlation coefficients between the subgrid sensible and latent heat fluxes within each grid cell at every time step (i.e., 30 minutes) using the following equation:

$$r = \frac{\sum_{i=1}^n w_i (F_{SH_i} - \bar{F}_{SH})(F_{LH_i} - \bar{F}_{LH})}{\sigma_{SH}\sigma_{LH}} \quad (2)$$

where  $n$  is the number of PFTs within a grid cell in the land model;  $w_i$  is the area percentage of each PFT within the grid cell;  $F_{SH_i}$  and  $F_{LH_i}$  are the subgrid surface sensible and latent heat fluxes of each PFT, respectively;  $\bar{F}_{SH}$  and  $\bar{F}_{LH}$  are the weighted averages of the subgrid sensible and latent heat fluxes in one grid cell, respectively; and  $\sigma_{SH}$  and  $\sigma_{LH}$  are the standard deviations of the subgrid sensible and latent heat fluxes in one grid cell, respectively.”

**Comment 6:**

*Section 2.3: Are the seasonal averages based on monthly means or higher temporal resolution? Daily data may yield a more realistic picture of model performance, even though it is averaged up to the seasonal level in analysis.*

**Reply:** All the analyses are computed based on the monthly output. For a single variable ( $x$ ) (e.g., temperature and precipitation), the seasonal averages using the monthly output are consistent with those using the daily output (both averaged over the model time step, 30 min). This is because the daily perturbation ( $x'$ ) on the multiyear seasonal averages should be 0 (i.e.,  $\bar{x}' = 0$ ).

**Comment 7:**

*Figure 2: Since the main region of interest in the TP, it would be helpful to also give the RMSE and correlation for that specific region (as it seems may be the norm in other figures of this paper).*

**Reply:** Thanks for the valuable suggestion. The RMSE and COR for the TP region have been added to Fig. 4 in the revision.

**Comment 8:**

*Figure 3 (and other figures): Suggest adding labels that denote “EXP – CTL” and “EXP\_COR – CTL” to each subpanel, as in Fig 2.*

**Reply:** Done.

**Comment 9:**

*Lines 196-200: This section seeks to draw comparisons to the EXP and EXP\_COR simulations, but there are no EXP-related plots in Fig. 5; please reproduce figures from Sun et al. that are key to this analysis within the current paper.*

**Reply:** Done. Please see Fig. R12 below (Fig. 6 in the revision).

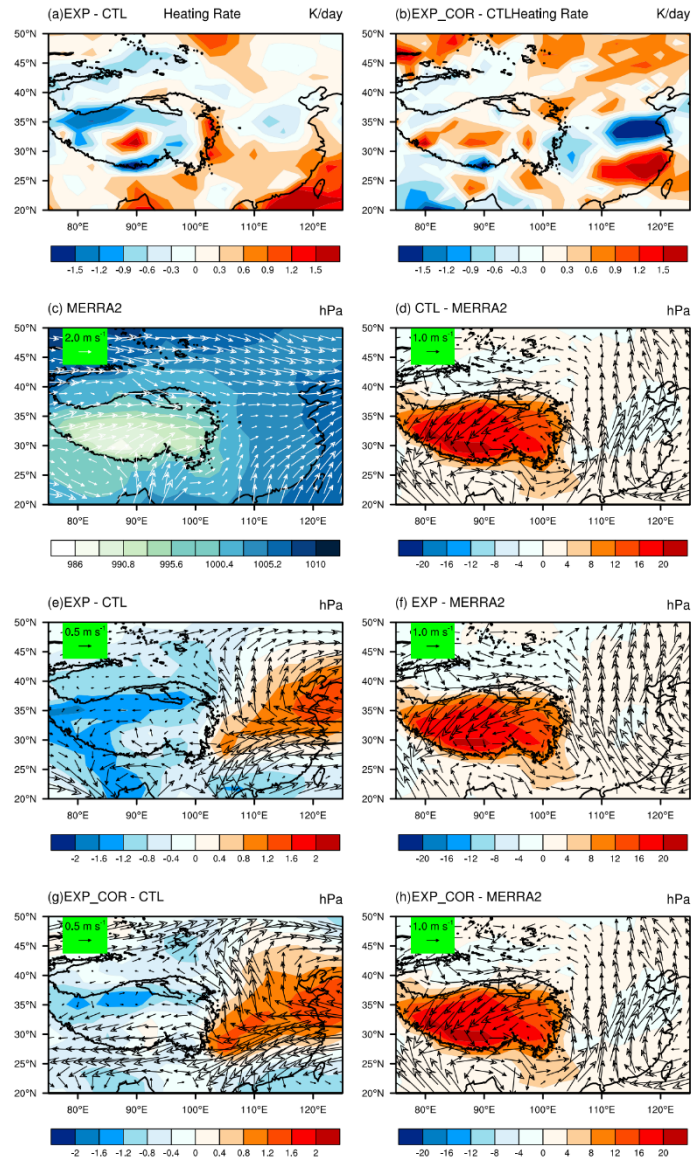

**Figure R12.** Spatial distributions of the differences of JJA-mean PBL heating (a) between EXP and CTL, and (b) between EXP\_COR and CTL, JJA-mean SLP superposed by the vector  $\vec{V}$  from (c) MERRA-2, and the differences (d) between CTL and MERRA-2, (e) between EXP and CTL, (f) between EXP and MERRA2, (g) between EXP\_COR and CTL, and (h) between EXP\_COR and MERRA2. The vector  $\vec{V}$  is defined in Eq. (3).

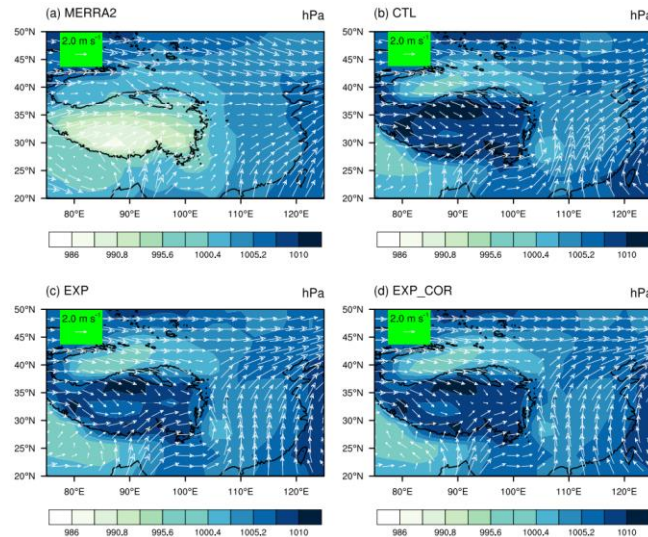

**Figure R13.** Spatial distributions of the JJA-mean SLP superposed by the vector  $\vec{V}$  from (a) MERRA2, (b) CTL, (c) EXP and (d) EXP\_COR. The vector  $\vec{V}$  is defined in Eq. (3).

**Comment 10:**

*Figure 5: In addition to including plots of the EXP case, it would be helpful to also include the raw EXP\_COR analysis and (space permitting for this) the difference from MERRA2 observations and not just the CLT case. This would make the analysis points that are made much more convincing and clearer.*

**Reply:** The raw EXP\_COR analysis has been added to Fig. R13 (Fig. S2 in the supplementary material). The differences in EXP and EXP\_COR between MERRA2 observations are included in Fig. R12d, f and h (Fig. 6d, f, h in the revision).

**Comment 11:**

*Line 211: As noted above, it does not appear that the atmospheric circulation is “corrected” in this case, so I suggest softening the language.*

**Reply:** We tuned down the tone in Lines 25-27 in the revision:

(1) “The altered large-scale circulation in the lower atmosphere due to anomalous heating/cooling in the planetary boundary layer is responsible for the change in moisture transport.”

and Lines 265-266:

(2) “The above analysis indicates that the precipitation simulation is improved through the adjustment of large-scale atmospheric circulation in the lower atmosphere, which is highly linked with grid-scale surface heating/cooling (Sun et al., 2021).”

and Lines 301-302:

(3) “As indicated in Sect. 3.1, large-scale atmospheric circulation in the lower atmosphere and local convection are altered as PBL heating changes affect clouds as well.”

**Comment 12:**

*Figure 6 (and others): Please clarify if the RMSE and COR values are just for the inset region over the TP? It would be helpful in general to have these values for both the full domain and the TP region itself.*

*It would also result in a cleaner plot to simply place a rectangle around the TP region where those values are calculated (perhaps in panel a) rather than an additional inset plot since the TP region is not any larger than in the main subpanel.*

**Reply:** We have updated Figs. 6-11 (now Figs. 7-12 in the revision) with a global view. Following the suggestion of reviewer #2, the inset plots of the TP region in each figure have been removed. The RMSE and COR are calculated for both the full domain and the TP region itself. The values for the latter are summarized separately in Table R3, which has been included in the supplementary material as Table S1.

**Comment 13:**

*Line 269: “It should be noted that there is a significant negative band along 60°N.” More explanation should be included if this is to be noted – why is this band present in EXP\_COR but not EXP, does this suggest better/worse agreement with obs, etc.*

**Reply:** This is discussed in detail in Lines 292-293 in the revision:

“On top of the EXP run, EXP\_COR further alleviates the overestimation along 45°N-60°N over the Eurasian continent where sensible heat fluxes and latent heat fluxes are highly correlated in this region (Fig. 2b).”

**Comment 14:**

*Fig 10: In this figure and similar ones that follow, it would be useful to show the raw CTL case values as well so that the reader can determine how large each change is relative to the baseline. It would also again be useful to include “EXP-CTL” and “EXP\_COR-CTL” in the plot titles.*

**Reply:** The simulations in the CTL run have been added to those figures (now Figs. 9-10 in the revision). The titles “EXP-CTL” and “EXP\_COR-CTL” were also included.

**Comment 15:**

*Fig. 13: It would be helpful to show the difference in bias (relative to obs) for each case, not just the difference in each case relative to CTL. That would make the statements in section 3.3 more clearly supported.*

**Reply:** The differences in biases relative to the observations for the three simulations

are shown in Figure R14 (now Fig. 13 in the revision). The difference in each case relative to CTL was retained in Fig. S8 (Fig. R15 here) in the revision for reference.

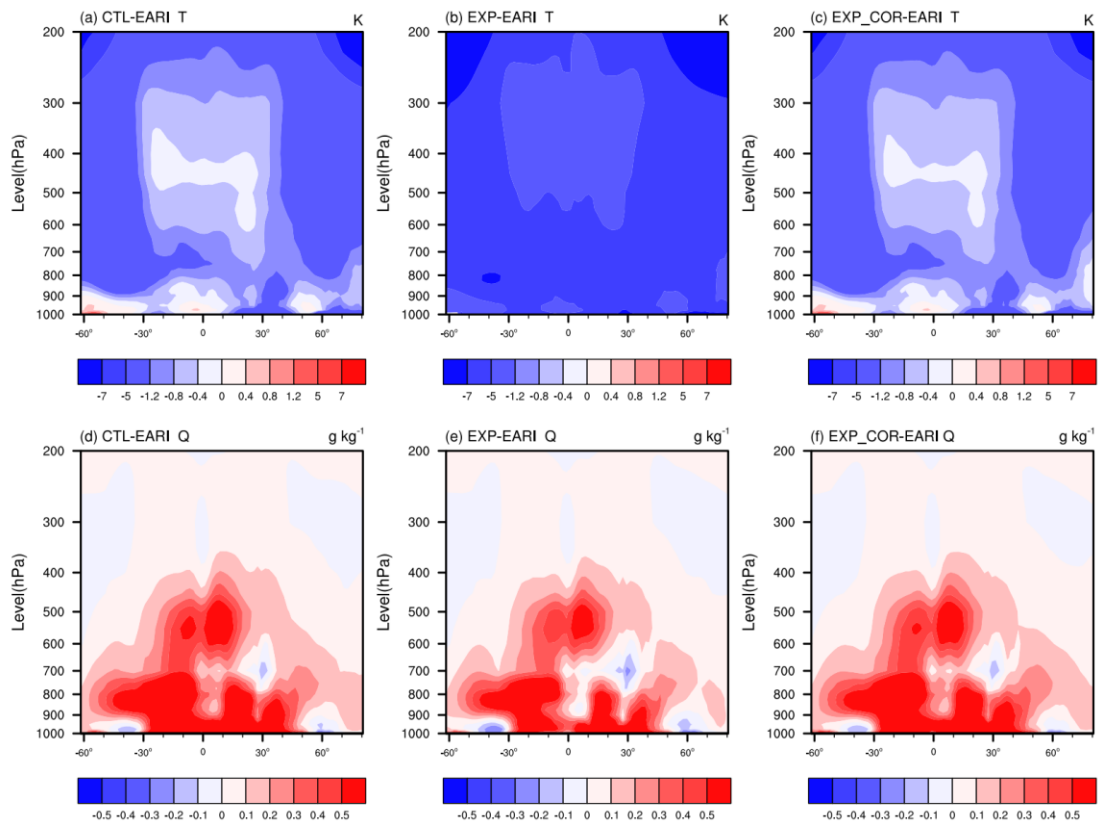

**Figure R14.** Annual and zonal mean cross-sections of the (a–c) temperature and (d–f) specific humidity differences for (a&d) CTL-ERAI, (b&e) EXP-CTL, and (c&f) EXP\_COR-CTL. The crossed areas are significant at the 95% level.

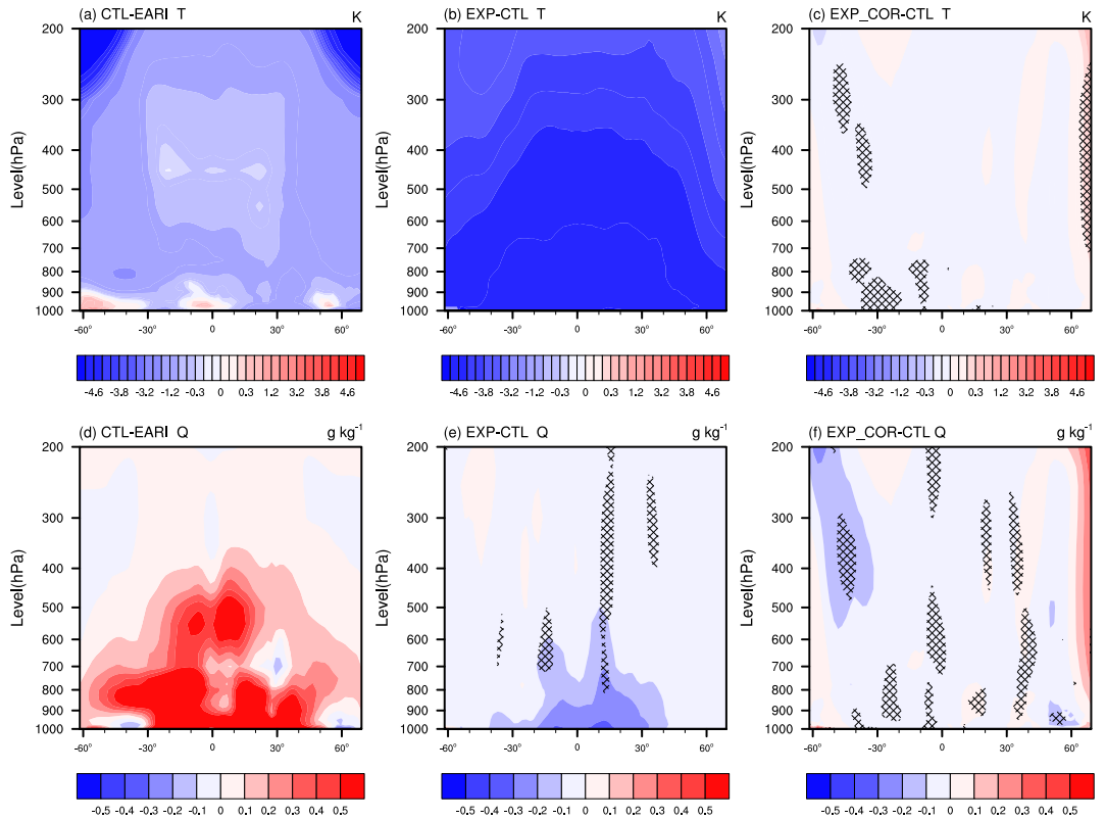

**Figure R15.** Annual and zonal mean cross-sections of the (a–c) temperature and (d–f) specific humidity differences for (a&d) CTL-ERAI, (b&e) EXP-CTL, and (c&f) EXP\_COR-CTL. The crossed areas are significant at the 95% level.

**Comment 16:**

*Lines 369-372: The precipitation improvements from EXP are mostly present in EXP\_COR, but Fig. 2f suggests a reintroduction of a dry bias over eastern China that had been removed in EXP, which should be noted. The overestimates in precipitation along the southern/eastern borders of the TP are also still present and of a large amplitude, so with the current colorbar it is hard to deduce that those biases are “significantly alleviated.”*

**Reply:** Please see our response to major comment 4.
